# Supplementary material
Source: Springer Nature journal article supplement (https://www.springermedizin.de/resource/supplementary/12985_2009_655_MOESM5_ESM.pdf/9608204)

**A)****Vero cells**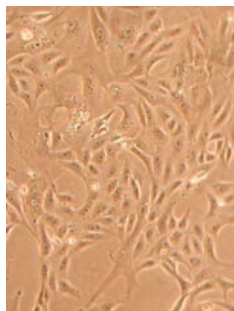**Vero cells + EV 71**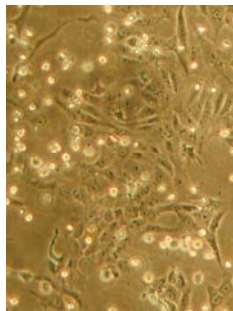**B)**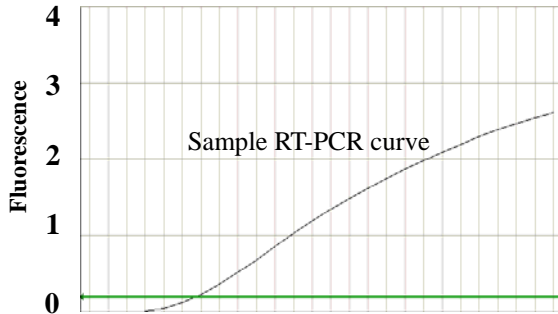**C)**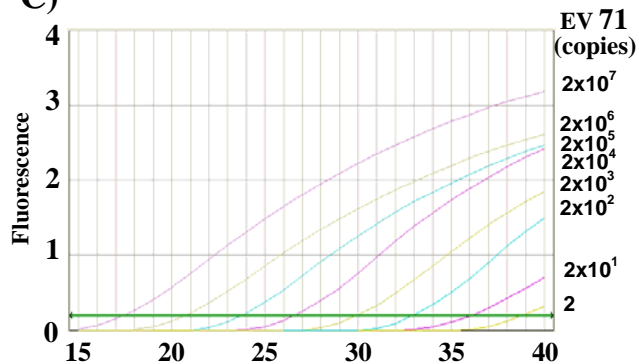**D)**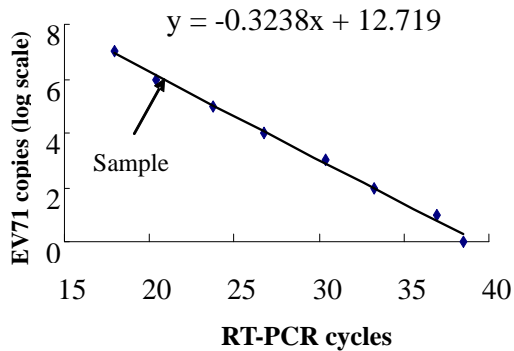

Supplement: MOESM5 [file 9608204]
